# Supplementary material
Source: publisher figshare collection journal article supplement (https://karger.figshare.com/articles/dataset/_/6462344)
Supplement: Supplementary file 1 [file 1]

## **SUPPLEMENTAL VIDEO**

Caption:

Case #1 - left internal carotid artery angiography immediately post reperfusion demonstrating active contrast extravasation in a lenticulostriate artery.
